# Supplementary material
Source: PubMed Central journal article supplement (PMC3065955)

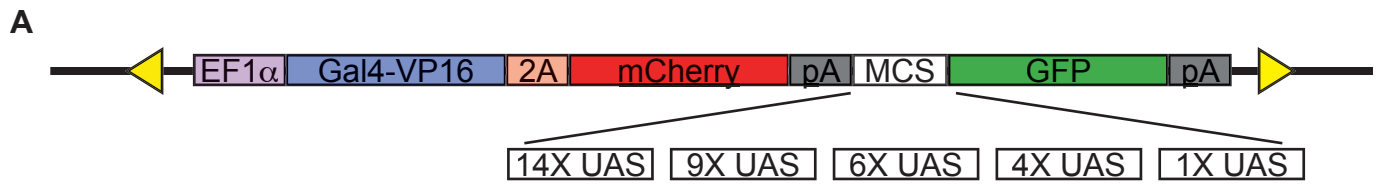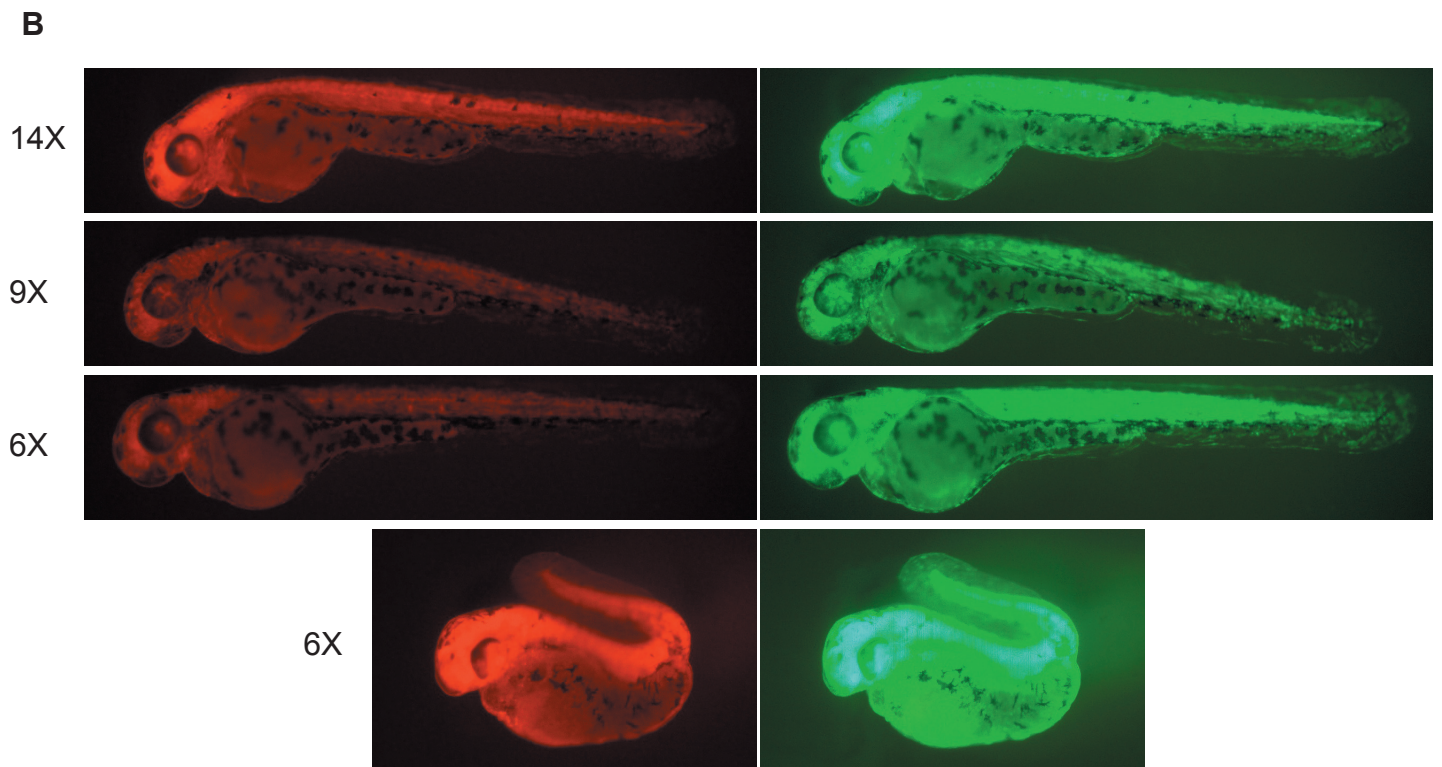

## 14X UAS

- 1: CGGAGTACTGTCCTCCGGGCTGG
- 2: CGGAGTACTGTCCTCCGGCAAGGT
- 3: CGGAGTACTGTCCTCCGACACTAGAGGT
- 4: CGGAGTACTGTCCTCCGACGCAAGG
- 5: CGGAGTACTGTCCTCCGGGCTG
- 6: CGGAGTACTGTCCTCCGGCAAGGT
- 7: CGGAGTACTGTCCTCCGACACTAGAGGT
- 8: CGGAGTACTGTCCTCCGACGCAAGGT
- 9: CGGAGTACTGTCCTCCGACACTAGAGGT
- 10: CGGAGTACTGTCCTCCGACGCAAGGT
- 11: CGGAGTACTGTCCTCCGACACTAGAGGT
- 12: CGGAGTACTGTCCTCCGACGCAAGG
- 13: CGGAGTACTGTCCTCCGGGCTGG
- 14: CGGAGTACTGTCCTCCG

## 4X non repetitive (4Xnr) UAS

- 1: CGGTGGCTTCTAATCCGTGAGTCCTAG
- 2: CGGGTGACAGCCCTCCGTCTTCACAGG
- 3: CGGAGGAGAGTCTTCCGTAGGGTTCCT
- 4: CGGAGTACTGTCCTCCG

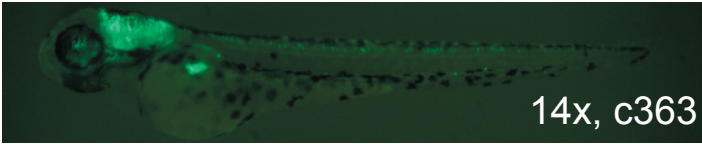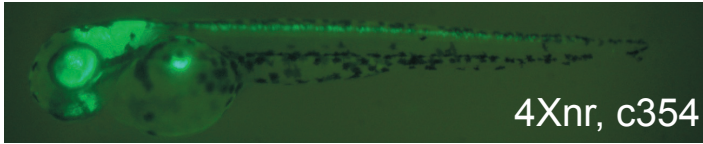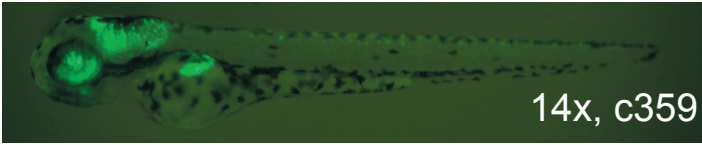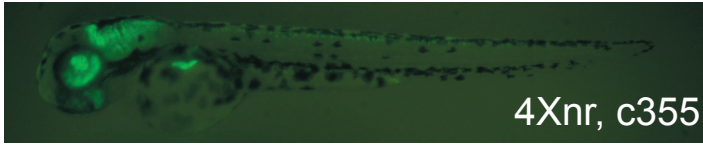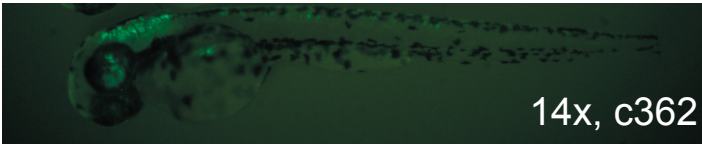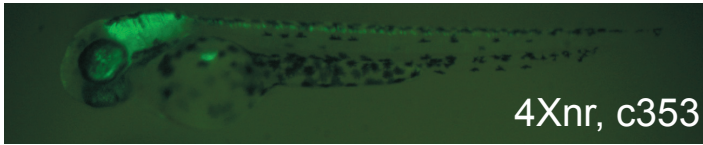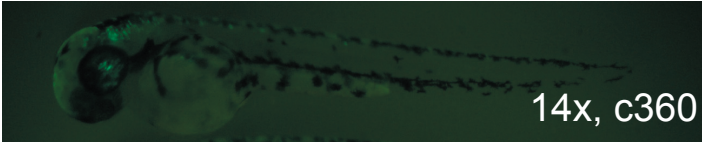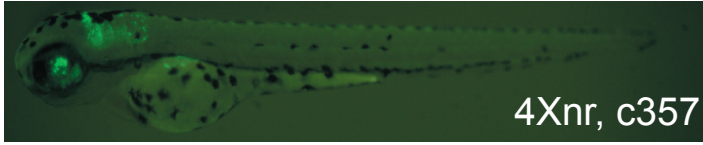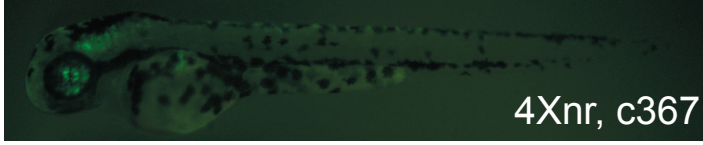

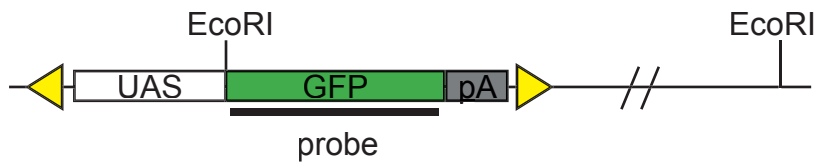

14X UAS                      4Xnr UAS

c361 c364                      c356 c368 c369

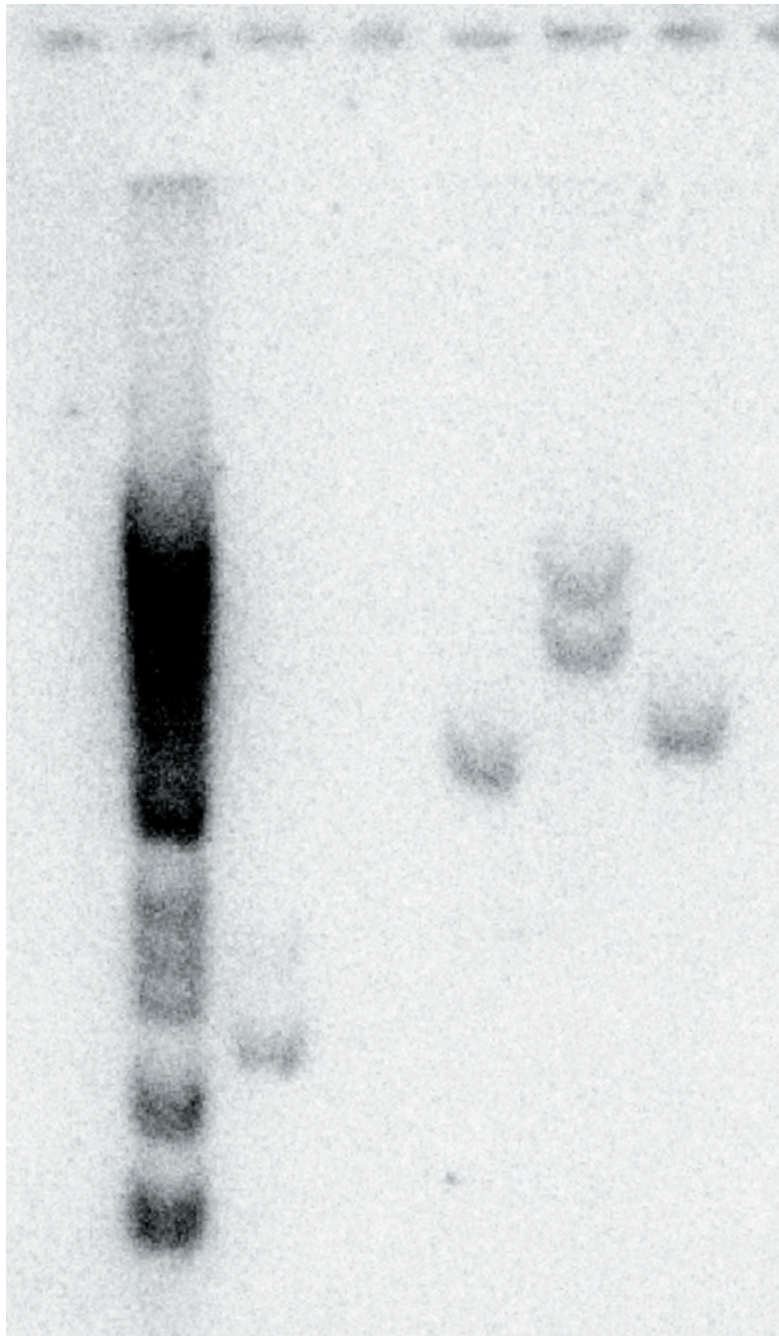

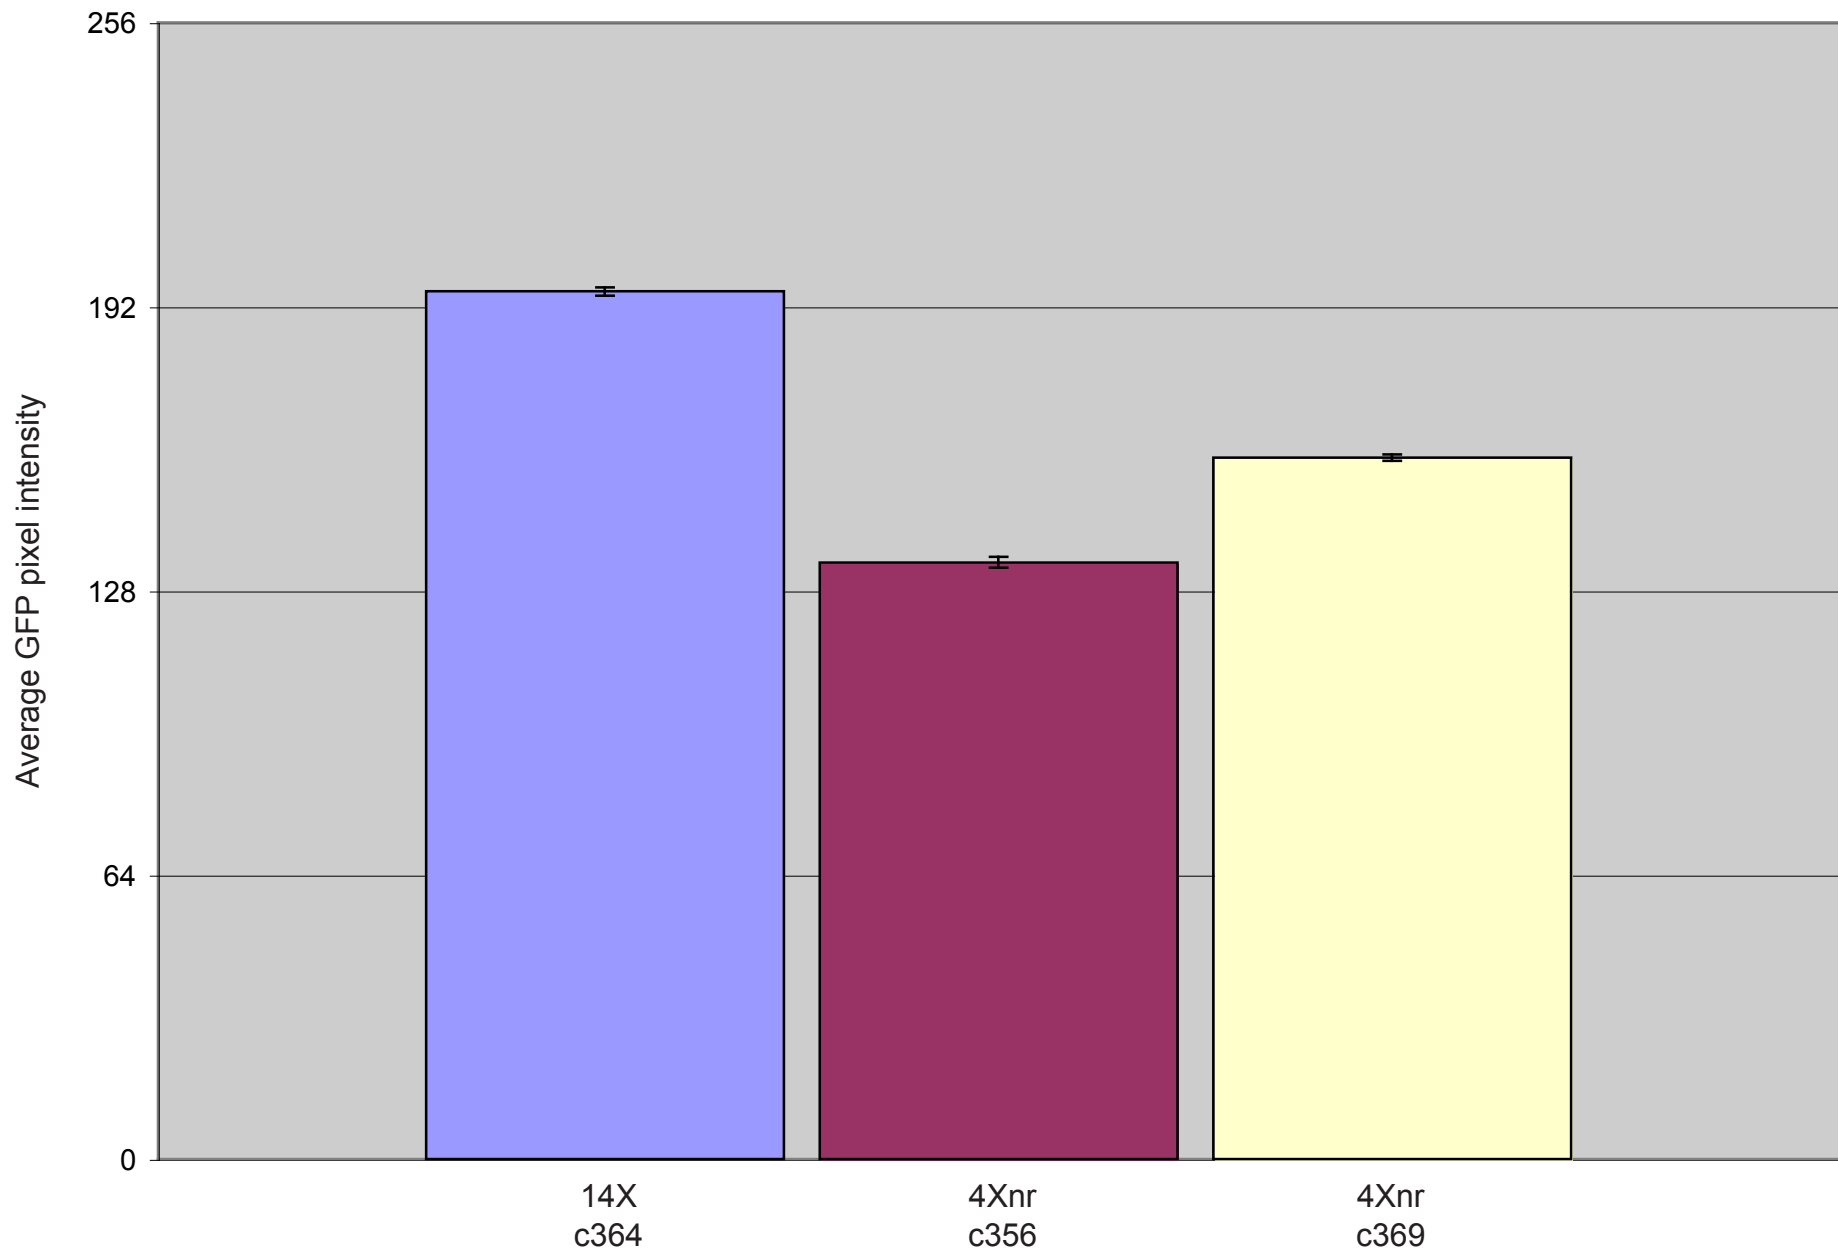

Supplement: NIHMS265106-supplement-01.pdf [file NIHMS265106-supplement-01.pdf]
